# Supplementary material for: Exercise-Induced ADAR2 Protects against Nonalcoholic Fatty Liver Disease through miR-34a
Source: MDPI journal article supplement (doi:10.3390/nu15010121), 2022-12-27
Supplement: s1 [file s1]

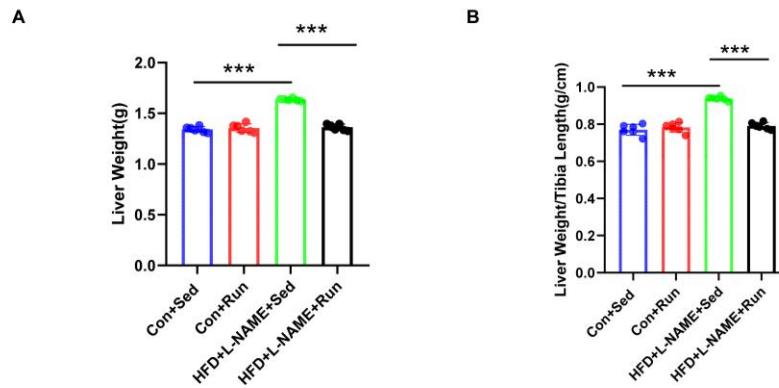

**Figure S1.** The liver weight of NAFLD/control mice after exercise or sedentary for 12 weeks. (A) The liver weight of mice. (B) The liver weight / tibia length of mice. \*\*\*P < 0.001; n=6. Sed, sedentary; HFD, high-fat diet; L-NAME, N $\omega$ -nitro-L-arginine methyl ester, hydrochloride.

**Table S1** The sequences of primers used for RT-PCR

| Gene                         | Primer sequence (5'-3') |
|------------------------------|-------------------------|
| mmu- <i>Gapdh</i> -Forward   | TGTGTCCGTCGTGGATCTGA    |
| mmu- <i>Gapdh</i> -Reverse   | CCTGCTTCACCACCTTCTTGAT  |
| mmu- <i>Adar2</i> -Forward   | GTATGACGCCAGACTCTCACCA  |
| mmu- <i>Adar2</i> -Reverse   | CAGGTCTGGATGCTGGCATTG   |
| mmu- <i>Fasn</i> -Forward    | CACAGTGCTCAAAGGACATGCC  |
| mmu- <i>Fasn</i> -Reverse    | CACCAGGTGTAGTGCCTTCCTC  |
| mmu- <i>Srebp1c</i> -Forward | CGACTACATCCGCTTCTTGACAG |
| mmu- <i>Srebp1c</i> -Reverse | CCTCCATAGACACATCTGTGCC  |
| hsa- <i>Gapdh</i> -Forward   | GTCTCCTCTGACTTCAACAGCG  |
| hsa- <i>Gapdh</i> -Reverse   | ACCACCCTGTTGCTGTAGCCAA  |
| hsa- <i>Fasn</i> -Forward    | TTCTACGGCTCCACGCTCTTCC  |
| hsa- <i>Fasn</i> -Reverse    | GAAGAGTCTTCGTCAGCCAGGA  |
| hsa- <i>Srebp1c</i> -Forward | ACTTCTGGAGGCATCGCAAGCA  |
| hsa- <i>Srebp1c</i> -Reverse | AGGTTCCAGAGGAGGCTACAAG  |
